# Supplementary material for: Longitudinal Associations of Pubertal Timing and Tempo With Adolescent Mental Health and Risk Behavior Initiation in Urban South Africa
Source: PubMed Central journal article supplement (PMC8253008; doi:10.1016/j.jadohealth.2020.09.043), 2021-07

Longitudinal associations of pubertal timing and tempo with adolescent mental health and risk behavior initiation in urban South Africa

**Supplemental Table S2.** Descriptive characteristics of included and excluded participants

|                                           | Included<br>(n = 1784) | Excluded<br>(n = 784) | p-value |
|-------------------------------------------|------------------------|-----------------------|---------|
| Sex - Females                             | 922 (52%)              | 397 (51%)             | 0.66    |
| Maternal age at birth                     | 25.77 (6.24)           | 26.03 (5.94)          | 0.33    |
| Maternal years of schooling               | 9.63 (2.71)            | 8.46 (3.59)           | < 0.01  |
| Marital status - Single                   | 1186 (67%)             | 445 (57%)             | < 0.01  |
| - Partnered                               | 591 (33%)              | 337 (43%)             |         |
| Asset tertile in early life - 1           | 610 (34%)              | 301 (38%)             | < 0.01  |
| - 2                                       | 360 (20%)              | 89 (11%)              |         |
| - 3                                       | 503 (28%)              | 85 (11%)              |         |
| - Missing                                 | 311 (17%)              | 309 (39%)             |         |
| Asset tertile at age 7 y - 1              | 647 (36%)              | 95 (12%)              | < 0.01  |
| - 2                                       | 395 (22%)              | 36 (5%)               |         |
| - 3                                       | 461 (26%)              | 50 (6%)               |         |
| - Missing                                 | 281 (16%)              | 603 (77%)             |         |
| Child stress in early life - Below median | 490 (27%)              | 218 (28%)             | < 0.01  |
| - Above median                            | 397 (22%)              | 133 (17%)             |         |
| - Missing                                 | 897 (50%)              | 433 (55%)             |         |
| Child stress at age 5 y - Below median    | 738 (41%)              | 91 (12%)              | < 0.01  |
| - Above median                            | 436 (24%)              | 33 (4%)               |         |
| - Missing                                 | 610 (34%)              | 660 (84%)             |         |
| Child stress at age 7 y - Below median    | 907 (51%)              | 101 (13%)             | < 0.01  |
| - Above median                            | 538 (30%)              | 39 (5%)               |         |
| - Missing                                 | 339 (19%)              | 644 (82%)             |         |

Longitudinal associations of pubertal timing and tempo with adolescent mental health and risk behavior initiation in urban South Africa

**Supplemental Table S3.** Unadjusted associations of male genital and pubic hair development classes with adolescent emotional and behavioral adjustment, eating attitudes, and patterns of risk behavior initiation<sup>a</sup>

|                                     | Gen class 1<br>(Later and slower) | Gen class 2 | Gen class 3                       | Gen class 4<br>(Earlier and faster) | PH class 1<br>(Later and slower)  | PH class 2 | PH class 3<br>(Earlier and faster) |
|-------------------------------------|-----------------------------------|-------------|-----------------------------------|-------------------------------------|-----------------------------------|------------|------------------------------------|
| Pattern of risk behavior initiation | OR (95% CI)                       | Ref         | OR (95% CI)                       | OR (95% CI)                         | OR (95% CI)                       | Ref        | OR (95% CI)                        |
| Low-risk                            | Ref                               | Ref         | Ref                               | Ref                                 | Ref                               | Ref        | Ref                                |
| Moderate risk                       | 1.17 (0.45, 3.01)                 | Ref         | 1.5 (0.94, 2.4)                   | 3.56 (1.3, 9.77)                    | 0.57 (0.35, 0.93)                 | Ref        | 2.25 (1.02, 4.99)                  |
| High-risk                           | 1.17 (0.44, 3.11)                 | Ref         | 2.16 (1.35, 3.45) <sup>b</sup>    | 4.01 (1.46, 11.05) <sup>b</sup>     | 0.73 (0.45, 1.16)                 | Ref        | 2.52 (1.15, 5.51)                  |
| Age 11 y sociobehavioral adjustment | β (95% CI)                        | Ref         | β (95% CI)                        | β (95% CI)                          | β (95% CI)                        | Ref        | β (95% CI)                         |
| Aff                                 | 0.24 (-0.63, 1.11)                | Ref         | -0.08 (-0.51, 0.35)               | 0.27 (-0.56, 1.1)                   | -0.01 (-0.46, 0.44)               | Ref        | -0.06 (-0.71, 0.59)                |
| Anx                                 | 0.6 (-0.05, 1.25)                 | Ref         | 0.27 (-0.06, 0.59)                | -0.31 (-0.92, 0.3)                  | -0.25 (-0.59, 0.08)               | Ref        | -0.27 (-0.75, 0.21)                |
| Som                                 | -0.68 (-1.49, 0.12)               | Ref         | 0.26 (-0.14, 0.65)                | 0.15 (-0.61, 0.9)                   | -0.4 (-0.81, 0.01)                | Ref        | 0.38 (-0.21, 0.98)                 |
| Attn Def                            | 0.04 (-0.88, 0.96)                | Ref         | 0.38 (-0.07, 0.84)                | 0.41 (-0.46, 1.28)                  | -0.44 (-0.91, 0.03)               | Ref        | 0.73 (0.06, 1.41)                  |
| Opp Def                             | -0.21 (-0.76, 0.34)               | Ref         | 0.22 (-0.06, 0.49)                | 0.45 (-0.08, 0.97)                  | -0.31 (-0.6, -0.03)               | Ref        | 0.37 (-0.04, 0.78)                 |
| Conduct                             | -0.33 (-1.3, 0.64)                | Ref         | -0.08 (-0.56, 0.39)               | 0.48 (-0.42, 1.38)                  | 0.05 (-0.44, 0.54)                | Ref        | 0.72 (0.02, 1.42)                  |
| Age 14 y sociobehavioral adjustment | β (95% CI)                        | Ref         | β (95% CI)                        | β (95% CI)                          | β (95% CI)                        | Ref        | β (95% CI)                         |
| Aff                                 | 1.15 (0.19, 2.12)                 | Ref         | 0.75 (0.26, 1.24) <sup>b</sup>    | -0.12 (-1.05, 0.81)                 | -0.41 (-0.92, 0.09)               | Ref        | -0.97 (-1.67, -0.26) <sup>b</sup>  |
| Anx                                 | 0.08 (-0.59, 0.76)                | Ref         | -0.13 (-0.46, 0.2)                | -0.29 (-0.93, 0.35)                 | -0.08 (-0.42, 0.27)               | Ref        | -0.13 (-0.61, 0.36)                |
| Som                                 | 0.35 (-0.22, 0.91)                | Ref         | 0.07 (-0.21, 0.36)                | 0.06 (-0.48, 0.6)                   | -0.12 (-0.41, 0.17)               | Ref        | 0.02 (-0.39, 0.43)                 |
| Attn Def                            | 1.05 (0.01, 2.09)                 | Ref         | 0.52 (-0.01, 1.04)                | 0.51 (-0.49, 1.5)                   | -0.38 (-0.92, 0.16)               | Ref        | -0.52 (-1.28, 0.23)                |
| Opp Def                             | -0.41 (-1.08, 0.25)               | Ref         | 0.29 (-0.04, 0.62)                | 1.11 (0.48, 1.74) <sup>b</sup>      | -0.47 (-0.81, -0.13) <sup>b</sup> | Ref        | 0.56 (0.09, 1.04)                  |
| Conduct                             | 0.03 (-1.09, 1.15)                | Ref         | 0.33 (-0.23, 0.9)                 | 0.38 (-0.69, 1.45)                  | -0.4 (-0.98, 0.18)                | Ref        | -0.29 (-1.1, 0.52)                 |
| Age 13 y eating attitudes           | β (95% CI)                        | Ref         | β (95% CI)                        | β (95% CI)                          | β (95% CI)                        | Ref        | β (95% CI)                         |
| Total                               | -0.29 (-2.72, 2.13)               | Ref         | -0.61 (-1.77, 0.54)               | -0.71 (-2.83, 1.41)                 | -0.18 (-1.39, 1.02)               | Ref        | 0.03 (-1.63, 1.7)                  |
| Dieting                             | -0.27 (-1.67, 1.14)               | Ref         | -0.21 (-0.88, 0.46)               | -0.27 (-1.5, 0.96)                  | -0.15 (-0.85, 0.55)               | Ref        | 0.46 (-0.5, 1.42)                  |
| Bulimia                             | 0.43 (-0.43, 1.3)                 | Ref         | 0.24 (-0.17, 0.66)                | 0.27 (-0.49, 1.03)                  | -0.2 (-0.63, 0.23)                | Ref        | -0.01 (-0.6, 0.59)                 |
| Oral control                        | -0.46 (-1.45, 0.54)               | Ref         | -0.64 (-1.12, -0.17) <sup>b</sup> | -0.71 (-1.58, 0.16)                 | 0.17 (-0.32, 0.66)                | Ref        | -0.42 (-1.1, 0.26)                 |
| Age 17 y eating attitudes           | β (95% CI)                        | Ref         | β (95% CI)                        | β (95% CI)                          | β (95% CI)                        | Ref        | β (95% CI)                         |
| Total                               | 0.85 (-1.59, 3.3)                 | Ref         | -1.43 (-2.75, -0.1)               | 0.43 (-2.05, 2.91)                  | 2.34 (0.98, 3.71) <sup>b</sup>    | Ref        | 1.82 (-0.12, 3.77)                 |
| Dieting                             | 0.42 (-1.18, 2.01)                | Ref         | -0.85 (-1.71, 0.01)               | 0.83 (-0.79, 2.45)                  | 1.27 (0.38, 2.16) <sup>b</sup>    | Ref        | 1.14 (-0.13, 2.41)                 |
| Bulimia                             | -0.28 (-1.09, 0.53)               | Ref         | -0.36 (-0.8, 0.08)                | 0.03 (-0.79, 0.85)                  | 0.38 (-0.08, 0.83)                | Ref        | 0.42 (-0.22, 1.07)                 |
| Oral control                        | 0.72 (-0.33, 1.77)                | Ref         | -0.22 (-0.78, 0.35)               | -0.43 (-1.49, 0.63)                 | 0.7 (0.12, 1.29)                  | Ref        | 0.26 (-0.58, 1.1)                  |

<sup>a</sup> Pattern of risk behavior initiation estimates are adjusted odds ratios from multinomial logistic regression. All other estimates are beta coefficients from linear regression. <sup>b</sup> Association significant given 10% false discovery rate. Abbreviations: Gen class, genital development class; PH class, pubic hair development class; Aff, affective problems; Anx, anxiety problems; Som, somatic problems; Attn Def, attention deficit problems; Opp Def, oppositional defiant problems; Conduct, conduct problems.

Longitudinal associations of pubertal timing and tempo with adolescent mental health and risk behavior initiation in urban South Africa

**Supplemental Table S4.** Unadjusted associations of female breast and pubic hair development classes and age of menarche with adolescent emotional and behavioral adjustment, eating attitudes, and patterns of risk behavior initiation<sup>a</sup>

|                                     | Br class 1<br>(Later and slower) | Br class 2 | Br class 3           | Br class 4<br>(Earlier and faster) | PH class 1<br>(Later and slower) | PH class 2 | PH class 3<br>(Earlier and faster) | Age at menarche                   |
|-------------------------------------|----------------------------------|------------|----------------------|------------------------------------|----------------------------------|------------|------------------------------------|-----------------------------------|
| Pattern of risk behavior initiation | OR (95% CI)                      | Ref        | OR (95% CI)          | OR (95% CI)                        | OR (95% CI)                      | Ref        | OR (95% CI)                        | OR (95% CI)                       |
| Low-risk                            | Ref                              | Ref        | Ref                  | Ref                                | Ref                              | Ref        | Ref                                | Ref                               |
| Moderate risk                       | 0.66 (0.38, 1.15)                | Ref        | 1.4 (0.82, 2.39)     | 1.48 (0.72, 3.04)                  | 0.53 (0.34, 0.82) <sup>b</sup>   | Ref        | 1.31 (0.62, 2.76)                  | 0.85 (0.72, 1.01)                 |
| High-risk                           | 0.93 (0.42, 2.09)                | Ref        | 2.21 (1.06, 4.61)    | 2.8 (1.12, 6.97)                   | 0.6 (0.34, 1.08)                 | Ref        | 1.9 (0.8, 4.54)                    | 0.62 (0.5, 0.79) <sup>b</sup>     |
| Age 11 y sociobehavioral adjustment | β (95% CI)                       | Ref        | β (95% CI)           | β (95% CI)                         | β (95% CI)                       | Ref        | β (95% CI)                         | β (95% CI)                        |
| Aff                                 | -0.22 (-0.86, 0.42)              | Ref        | -0.63 (-1.19, -0.07) | -0.31 (-1.03, 0.4)                 | 0.25 (-0.23, 0.73)               | Ref        | 0.06 (-0.6, 0.72)                  | -0.11 (-0.28, 0.06)               |
| Anx                                 | 0.11 (-0.3, 0.52)                | Ref        | -0.01 (-0.36, 0.35)  | 0.35 (-0.11, 0.81)                 | 0.04 (-0.27, 0.34)               | Ref        | 0.2 (-0.23, 0.62)                  | -0.04 (-0.15, 0.07)               |
| Som                                 | -0.2 (-0.74, 0.33)               | Ref        | 0.04 (-0.42, 0.5)    | 0.24 (-0.35, 0.84)                 | -0.21 (-0.61, 0.19)              | Ref        | -0.17 (-0.72, 0.38)                | -0.15 (-0.3, -0.01)               |
| Attn Def                            | -0.49 (-1.12, 0.14)              | Ref        | 0.15 (-0.4, 0.7)     | 0.31 (-0.4, 1.02)                  | 0.1 (-0.38, 0.57)                | Ref        | 0.61 (-0.05, 1.27)                 | -0.18 (-0.35, -0.01)              |
| Opp Def                             | -0.05 (-0.41, 0.31)              | Ref        | 0.05 (-0.27, 0.36)   | 0.08 (-0.32, 0.49)                 | -0.14 (-0.41, 0.13)              | Ref        | 0.34 (-0.03, 0.71)                 | -0.16 (-0.25, -0.06) <sup>b</sup> |
| Conduct                             | 0.1 (-0.41, 0.62)                | Ref        | -0.14 (-0.59, 0.31)  | 0.06 (-0.52, 0.64)                 | 0.38 (-0.01, 0.77)               | Ref        | 0.29 (-0.24, 0.82)                 | -0.05 (-0.19, 0.09)               |
| Age 14 y sociobehavioral adjustment | β (95% CI)                       | Ref        | β (95% CI)           | β (95% CI)                         | β (95% CI)                       | Ref        | β (95% CI)                         | β (95% CI)                        |
| Aff                                 | 0.03 (-0.78, 0.84)               | Ref        | 0.22 (-0.49, 0.93)   | 0.98 (0.07, 1.9)                   | -0.12 (-0.73, 0.49)              | Ref        | 1.04 (0.19, 1.89)                  | -0.39 (-0.62, -0.16) <sup>b</sup> |
| Anx                                 | -0.11 (-0.56, 0.34)              | Ref        | -0.05 (-0.45, 0.35)  | 0.22 (-0.28, 0.73)                 | -0.38 (-0.72, -0.05)             | Ref        | 0.22 (-0.25, 0.69)                 | -0.17 (-0.3, -0.05) <sup>b</sup>  |
| Som                                 | -0.16 (-0.64, 0.31)              | Ref        | -0.09 (-0.51, 0.33)  | 0.28 (-0.25, 0.82)                 | -0.18 (-0.54, 0.18)              | Ref        | -0.24 (-0.74, 0.26)                | -0.08 (-0.21, 0.05)               |
| Attn Def                            | -0.34 (-0.98, 0.3)               | Ref        | 0.48 (-0.09, 1.04)   | 0.66 (-0.06, 1.39)                 | -0.15 (-0.63, 0.33)              | Ref        | 1.29 (0.62, 1.96) <sup>b</sup>     | -0.44 (-0.62, -0.27) <sup>b</sup> |
| Opp Def                             | -0.43 (-0.88, 0.03)              | Ref        | 0.03 (-0.37, 0.43)   | 0.12 (-0.4, 0.64)                  | -0.42 (-0.77, -0.08)             | Ref        | 0.38 (-0.1, 0.86)                  | -0.33 (-0.46, -0.2) <sup>b</sup>  |
| Conduct                             | 0 (-0.6, 0.59)                   | Ref        | 0.48 (-0.05, 1)      | 0.78 (0.1, 1.45)                   | -0.41 (-0.86, 0.04)              | Ref        | 0.35 (-0.28, 0.98)                 | -0.18 (-0.35, -0.02)              |
| Age 13 y eating attitudes           | β (95% CI)                       | Ref        | β (95% CI)           | β (95% CI)                         | β (95% CI)                       | Ref        | β (95% CI)                         | β (95% CI)                        |
| Total                               | 0.96 (-0.64, 2.56)               | Ref        | 0.21 (-1.21, 1.64)   | 1.29 (-0.51, 3.09)                 | 0.9 (-0.31, 2.11)                | Ref        | 0.67 (-1.02, 2.36)                 | -0.07 (-0.52, 0.38)               |
| Dieting                             | 0.23 (-0.67, 1.13)               | Ref        | 0.84 (0.03, 1.64)    | 1.86 (0.85, 2.87) <sup>b</sup>     | 0.05 (-0.64, 0.73)               | Ref        | 0.97 (0.01, 1.93)                  | -0.25 (-0.51, 0.01)               |
| Bulimia                             | 0.26 (-0.21, 0.74)               | Ref        | -0.18 (-0.6, 0.25)   | -0.43 (-0.96, 0.11)                | 0.39 (0.03, 0.75)                | Ref        | -0.07 (-0.57, 0.43)                | 0.02 (-0.12, 0.15)                |
| Oral control                        | 0.47 (-0.26, 1.19)               | Ref        | -0.45 (-1.09, 0.2)   | -0.15 (-0.96, 0.67)                | 0.46 (-0.09, 1.01)               | Ref        | -0.23 (-0.99, 0.54)                | 0.16 (-0.04, 0.37)                |
| Age 17 y eating attitudes           | β (95% CI)                       | Ref        | β (95% CI)           | β (95% CI)                         | β (95% CI)                       | Ref        | β (95% CI)                         | β (95% CI)                        |
| Total                               | -0.35 (-2.61, 1.9)               | Ref        | -0.01 (-2.08, 2.06)  | 0.88 (-1.64, 3.4)                  | 0.86 (-0.87, 2.59)               | Ref        | 2.31 (-0.03, 4.65)                 | -0.33 (-1, 0.33)                  |
| Dieting                             | -0.04 (-1.44, 1.37)              | Ref        | -0.01 (-1.31, 1.28)  | 1.08 (-0.49, 2.65)                 | 0.66 (-0.43, 1.74)               | Ref        | 1.19 (-0.27, 2.65)                 | -0.13 (-0.54, 0.29)               |
| Bulimia                             | -0.28 (-0.94, 0.38)              | Ref        | -0.24 (-0.85, 0.37)  | -0.64 (-1.38, 0.1)                 | 0.01 (-0.50, 0.53)               | Ref        | 0.29 (-0.4, 0.98)                  | 0.01 (-0.19, 0.21)                |
| Oral control                        | -0.03 (-0.95, 0.89)              | Ref        | 0.25 (-0.6, 1.09)    | 0.43 (-0.6, 1.46)                  | 0.19 (-0.51, 0.90)               | Ref        | 0.83 (-0.13, 1.79)                 | -0.22 (-0.49, 0.06)               |

<sup>a</sup> Pattern of risk behavior initiation estimates are adjusted odds ratios from multinomial logistic regression. All other estimates are beta coefficients from linear regression. <sup>b</sup> Association significant given 10% false discovery rate. Abbreviations: Br class, breast development class; PH class, pubic hair development class; Aff, affective problems; Anx, anxiety problems; Som, somatic problems; Attn Def, attention deficit problems; Opp Def, oppositional defiant problems; Conduct, conduct problems.

Longitudinal associations of pubertal timing and tempo with adolescent mental health and risk behavior initiation in urban South Africa

**Supplemental Table S5.** Associations of genital/breast development and pubic hair development classes with adolescent emotional and behavioral adjustment modified by childhood stress<sup>a</sup>

|                    | Gen/Br class 1<br>β (95% CI) | Gen/Br class 2<br>β (95% CI) | Gen/Br class 3<br>β (95% CI)  | Gen/Br class 4<br>β (95% CI)   | PH class 1<br>β (95% CI)          | PH class 2<br>β (95% CI) | PH class 3<br>β (95% CI)       |
|--------------------|------------------------------|------------------------------|-------------------------------|--------------------------------|-----------------------------------|--------------------------|--------------------------------|
| <b>Males</b>       |                              |                              |                               |                                |                                   |                          |                                |
| Som 11 y 0X        | --                           | --                           | --                            | --                             | -0.57 (-1.19, 0.05)               | Ref                      | 0.54 (-0.32, 1.4)              |
| Som 11 y 1X        | --                           | --                           | --                            | --                             | -1.17 (-1.94, -0.41) <sup>b</sup> | Ref                      | -1.33 (-2.52, -0.13)           |
| Som 11 y 2-3X      | --                           | --                           | --                            | --                             | 0.36 (-0.46, 1.18)                | Ref                      | 1.75 (0.64, 2.87) <sup>b</sup> |
| Attn Def 14 y 0X   | 0.81 (-0.71, 2.33)           | Ref                          | 0.8 (-0.01, 1.6)              | 2.25 (0.6, 3.9) <sup>b</sup>   | --                                | --                       | --                             |
| Attn Def 14 y 1X   | 0.77 (-0.85, 2.4)            | Ref                          | -0.32 (-1.23, 0.59)           | -0.37 (-1.95, 1.21)            | --                                | --                       | --                             |
| Attn Def 14 y 2-3X | 2.74 (-0.14, 5.62)           | Ref                          | 1.9 (0.63, 3.17) <sup>b</sup> | -0.24 (-2.38, 1.9)             | --                                | --                       | --                             |
| Conduct 14 y 0X    | --                           | --                           | --                            | --                             | -0.96 (-1.87, -0.05)              | Ref                      | 0.21 (-1.05, 1.47)             |
| Conduct 14 y 1X    | --                           | --                           | --                            | --                             | 0.56 (-0.51, 1.64)                | Ref                      | -0.93 (-2.45, 0.58)            |
| Conduct 14 y 2-3X  | --                           | --                           | --                            | --                             | -1.9 (-3.27, -0.53) <sup>b</sup>  | Ref                      | -0.75 (-2.49, 0.98)            |
| <b>Females</b>     |                              |                              |                               |                                |                                   |                          |                                |
| Attn Def 11 y 0X   | -1.17 (-2.29, -0.04)         | Ref                          | 0.15 (-0.8, 1.11)             | 0.78 (-0.45, 2.02)             | -0.05 (-0.84, 0.74)               | Ref                      | 1.63 (0.48, 2.77) <sup>b</sup> |
| Attn Def 11 y 1X   | -0.99 (-1.95, -0.02)         | Ref                          | -0.37 (-1.22, 0.49)           | -0.91 (-1.94, 0.11)            | 0 (-0.75, 0.75)                   | Ref                      | -0.9 (-1.99, 0.18)             |
| Attn Def 11 y 2-3X | 1.37 (-0.03, 2.77)           | Ref                          | 1.23 (-0.01, 2.47)            | 1.68 (-0.15, 3.51)             | 0.83 (-0.25, 1.91)                | Ref                      | 1.03 (-0.3, 2.37)              |
| Som 14 y 0X        | 0.15 (-0.62, 0.92)           | Ref                          | 0.29 (-0.37, 0.96)            | 1.34 (0.51, 2.18) <sup>b</sup> | --                                | --                       | --                             |
| Som 14 y 1X        | -0.72 (-1.49, 0.06)          | Ref                          | -0.51 (-1.2, 0.18)            | -0.75 (-1.6, 0.09)             | --                                | --                       | --                             |
| Som 14 y 2-3X      | 0.6 (-0.5, 1.7)              | Ref                          | 0.1 (-0.86, 1.06)             | 0.27 (-1.19, 1.73)             | --                                | --                       | --                             |

<sup>a</sup> Estimates are β (95% CI) from linear regressions. <sup>b</sup> Association significant given 10% false discovery rate. Abbreviations: Gen/Br class, genital/breast development class; PH class, pubic hair development class; Som, somatic problems; Attn Def, attention deficit problems; Conduct, conduct problems.

**Supplemental Figure S1.** Birth to Twenty Plus analytical sample

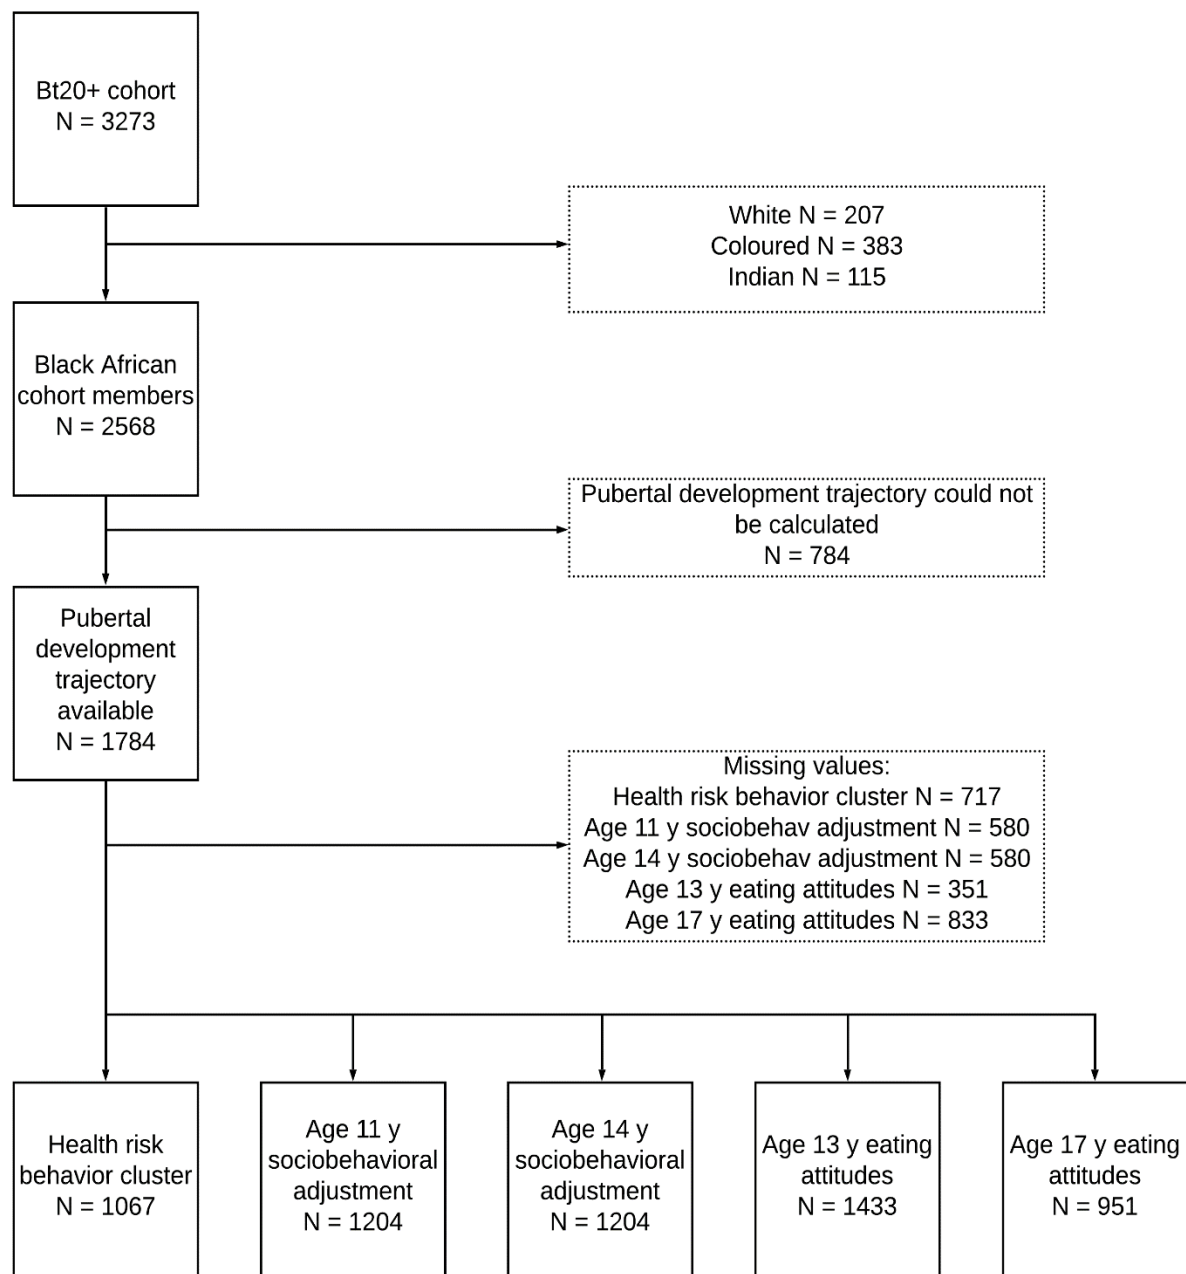

Longitudinal associations of pubertal timing and tempo with adolescent mental health and risk behavior initiation in urban South Africa  
**Supplemental Figure S2.** Adjusted associations of male genital and pubic hair development classes with patterns of health risk behavior initiation

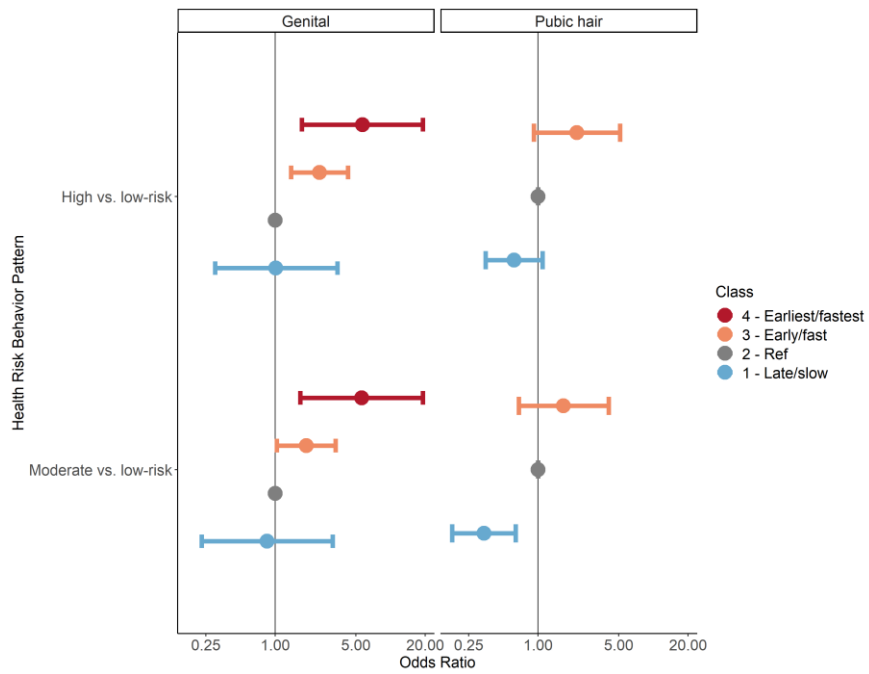

Longitudinal associations of pubertal timing and tempo with adolescent mental health and risk behavior initiation in urban South Africa

**Supplemental Figure S3.** Adjusted associations of male genital and pubic hair development classes with emotional and behavioral problems at ages 11 and 14 y

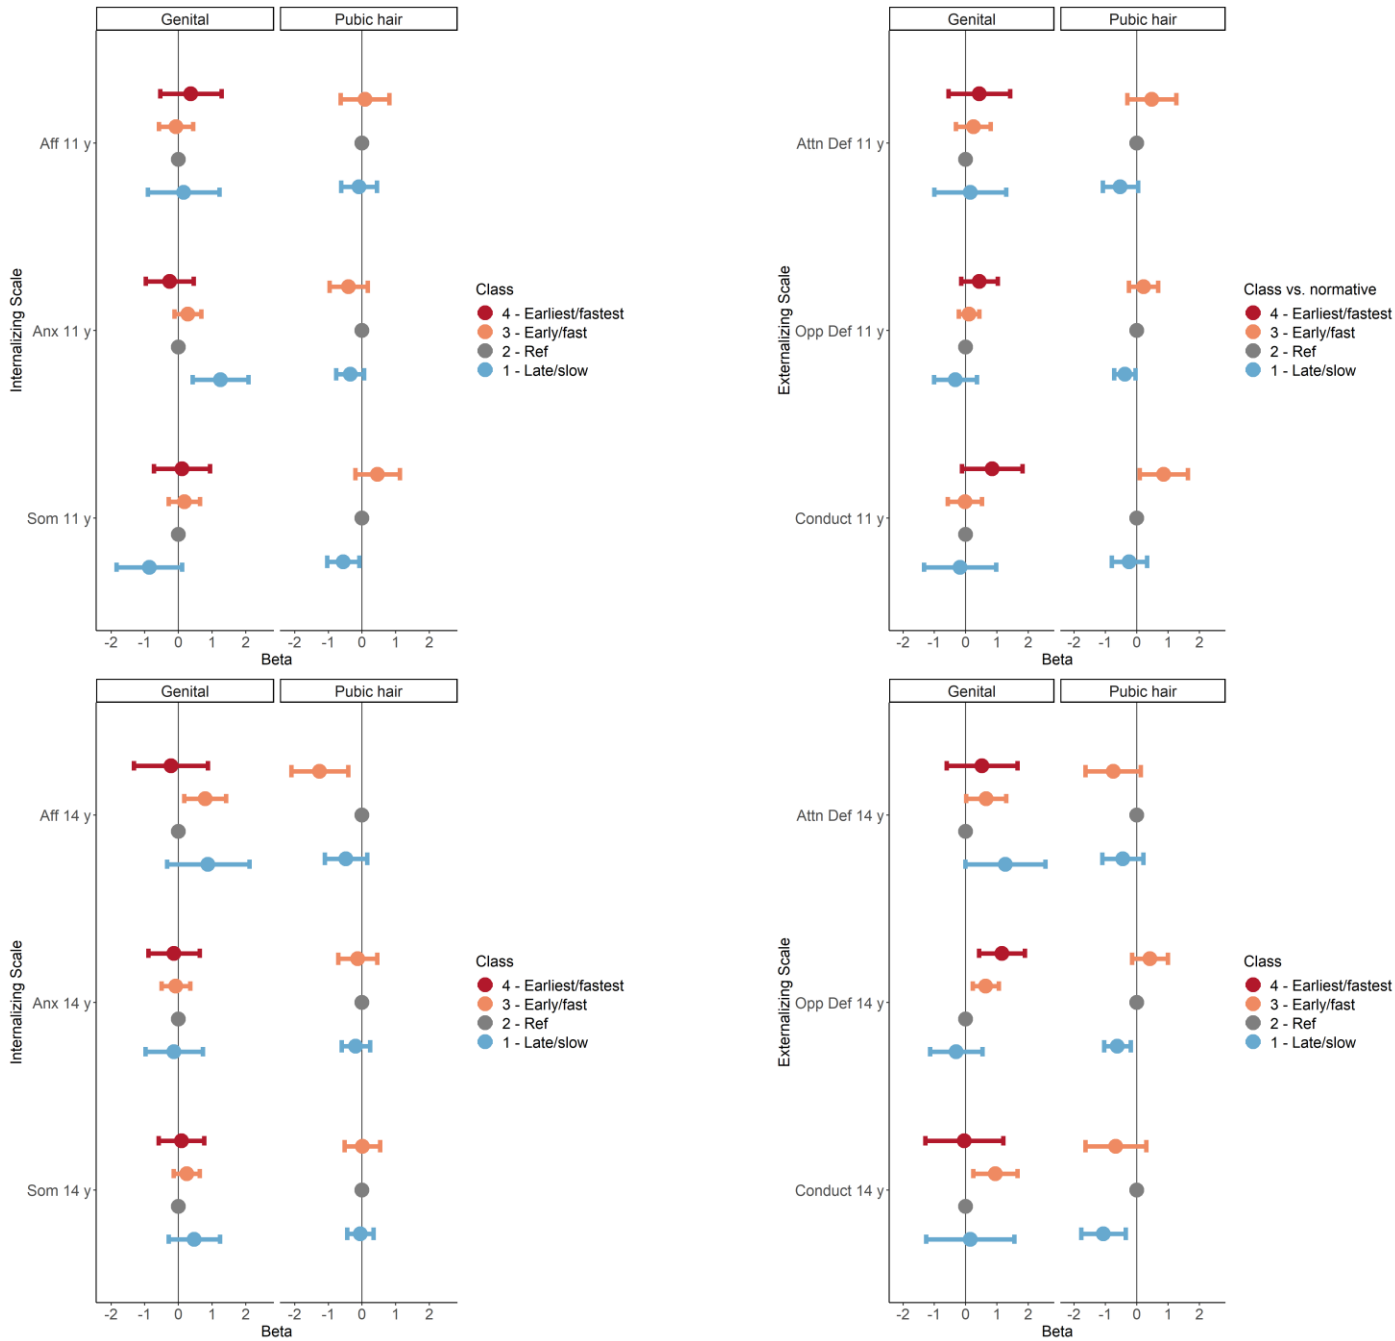



Longitudinal associations of pubertal timing and tempo with adolescent mental health and risk behavior initiation in urban South Africa

**Supplemental Figure S4.** Adjusted associations of male genital and pubic hair development classes with eating attitudes at ages 13 and 17 y

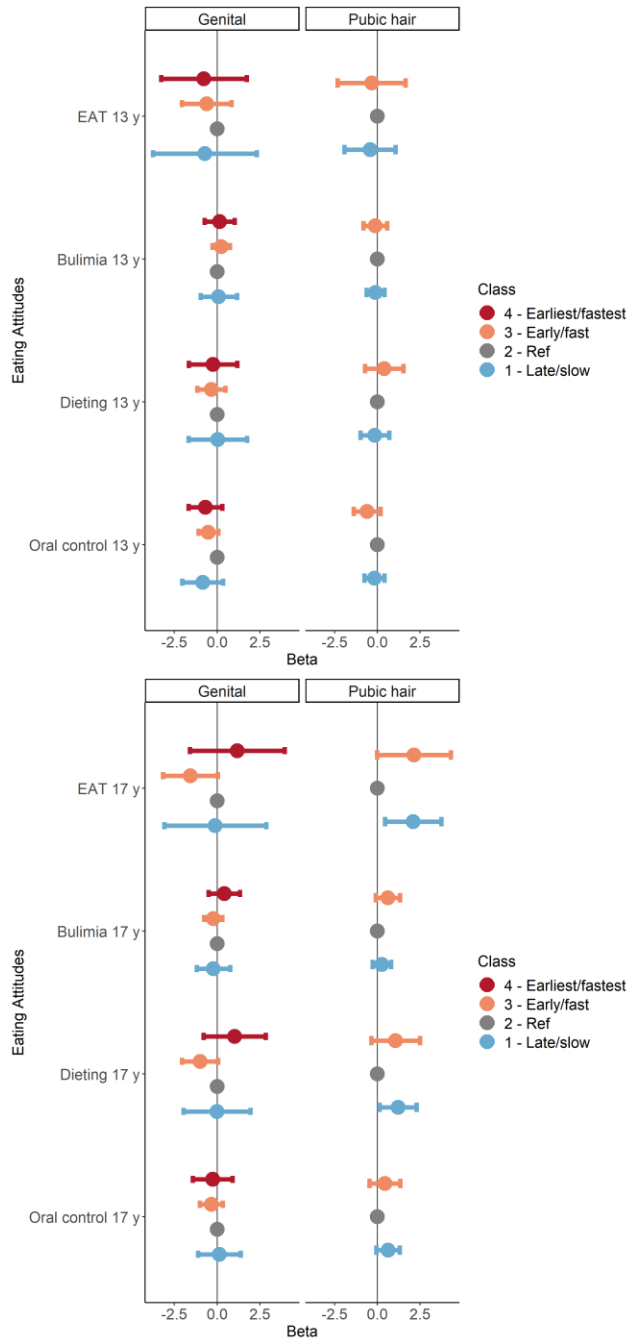

Longitudinal associations of pubertal timing and tempo with adolescent mental health and risk behavior initiation in urban South Africa

**Supplemental Figure S5.** Adjusted associations of female breast and pubic hair development classes and age at menarche with health risk behavior initiation patterns

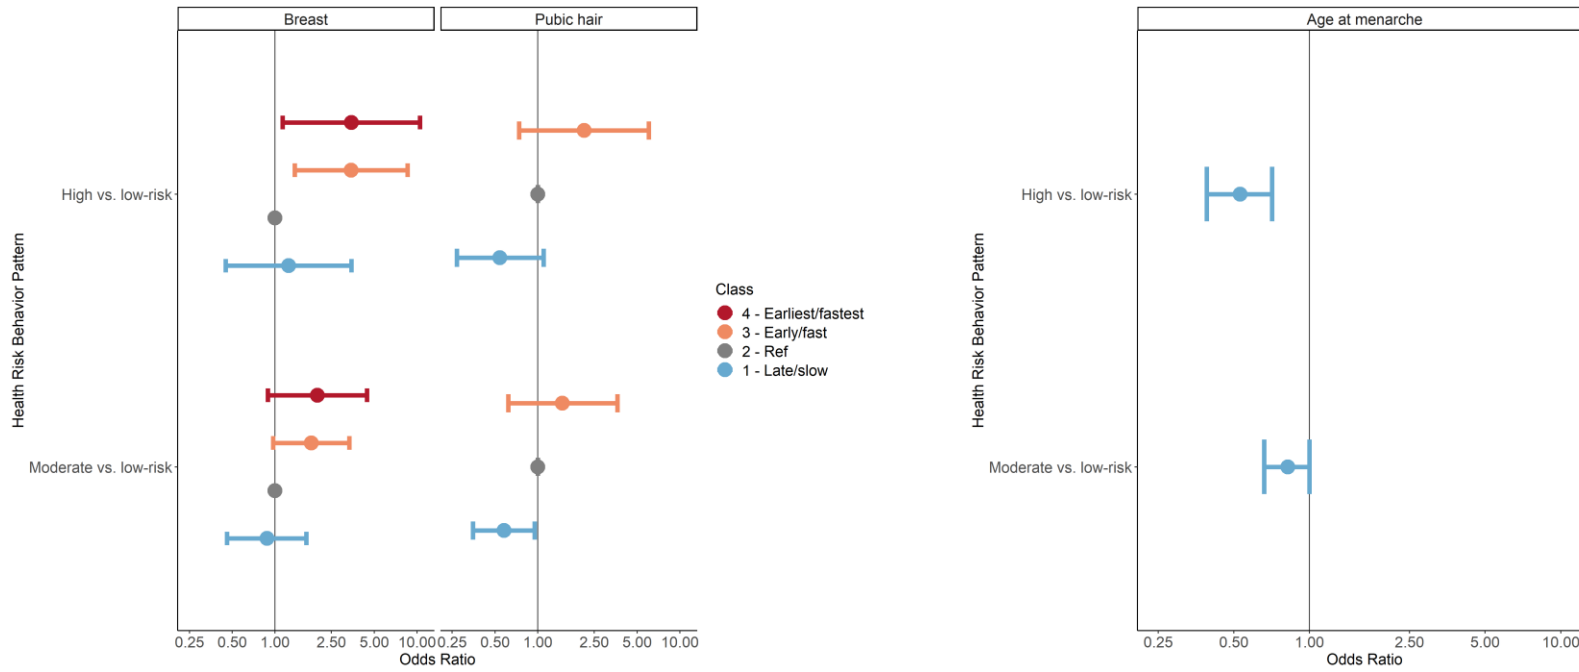

Longitudinal associations of pubertal timing and tempo with adolescent mental health and risk behavior initiation in urban South Africa

**Supplemental Figure S6.** Adjusted associations of female breast and pubic hair development classes and age at menarche with affective problems, anxiety problems, and somatic problems at ages 11 and 14 y

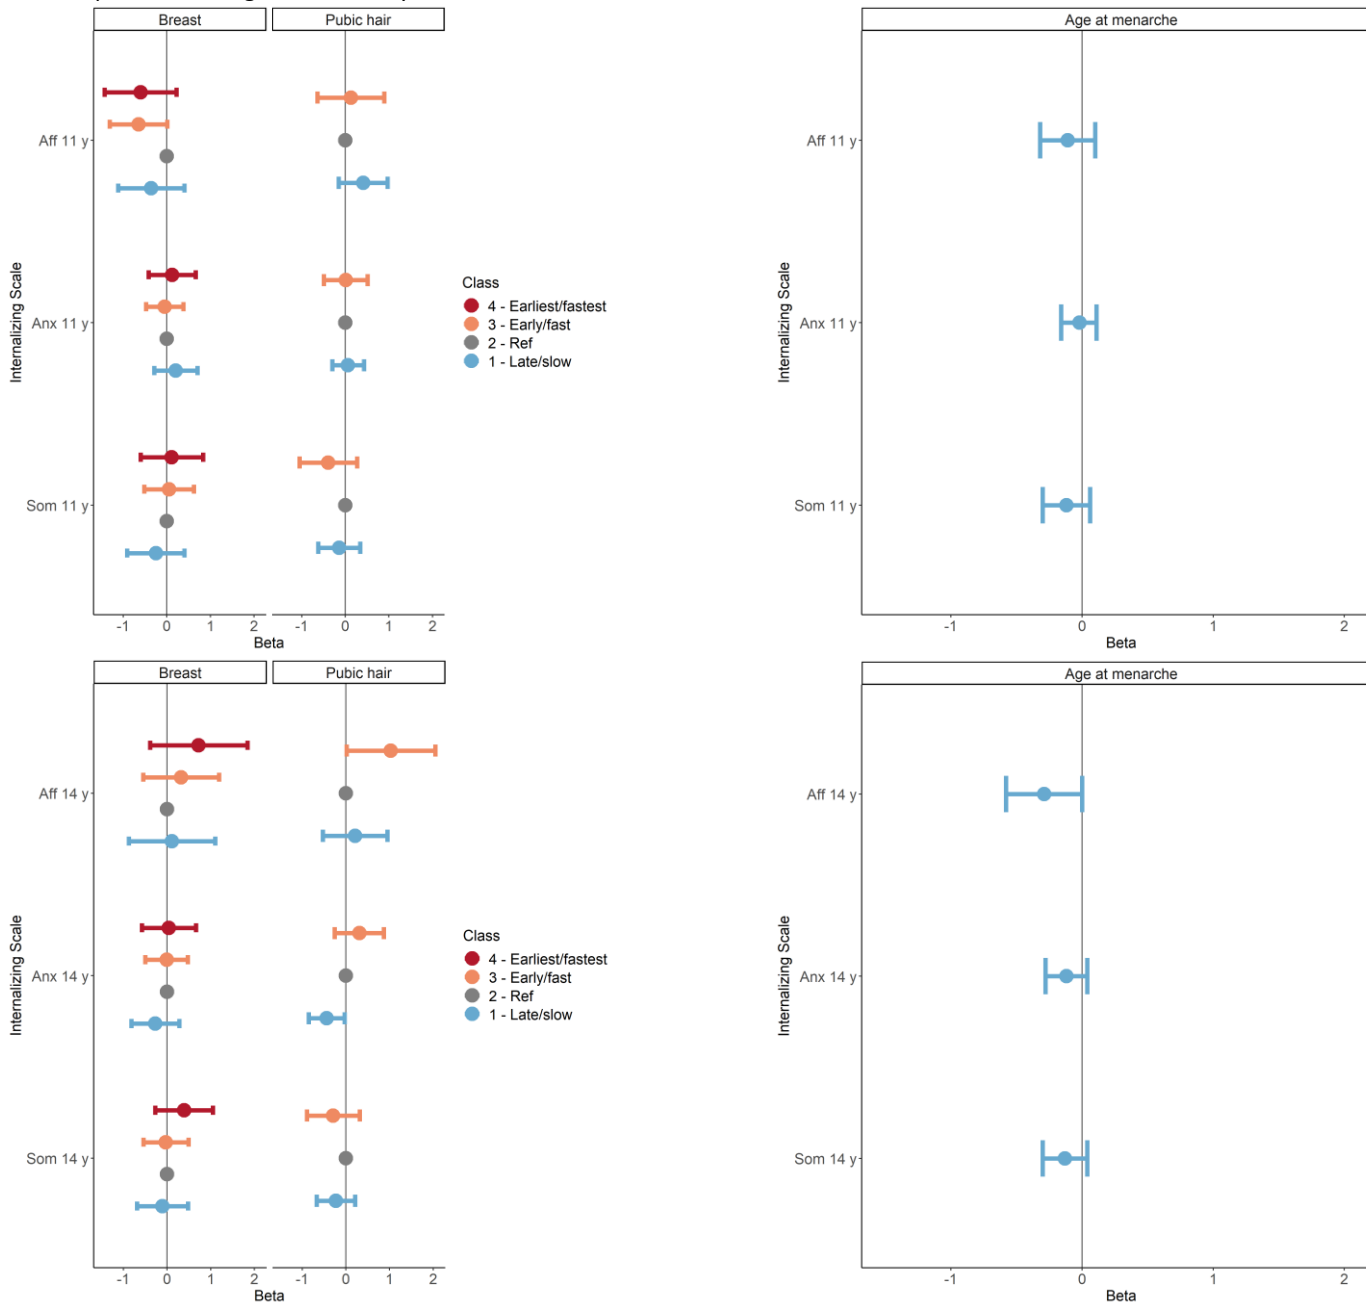

Longitudinal associations of pubertal timing and tempo with adolescent mental health and risk behavior initiation in urban South Africa

**Supplemental Figure S7.** Adjusted associations of female breast and pubic hair development classes and age at menarche with attention deficit problems, oppositional defiant problems, and conduct problems at ages 11 and 14 y

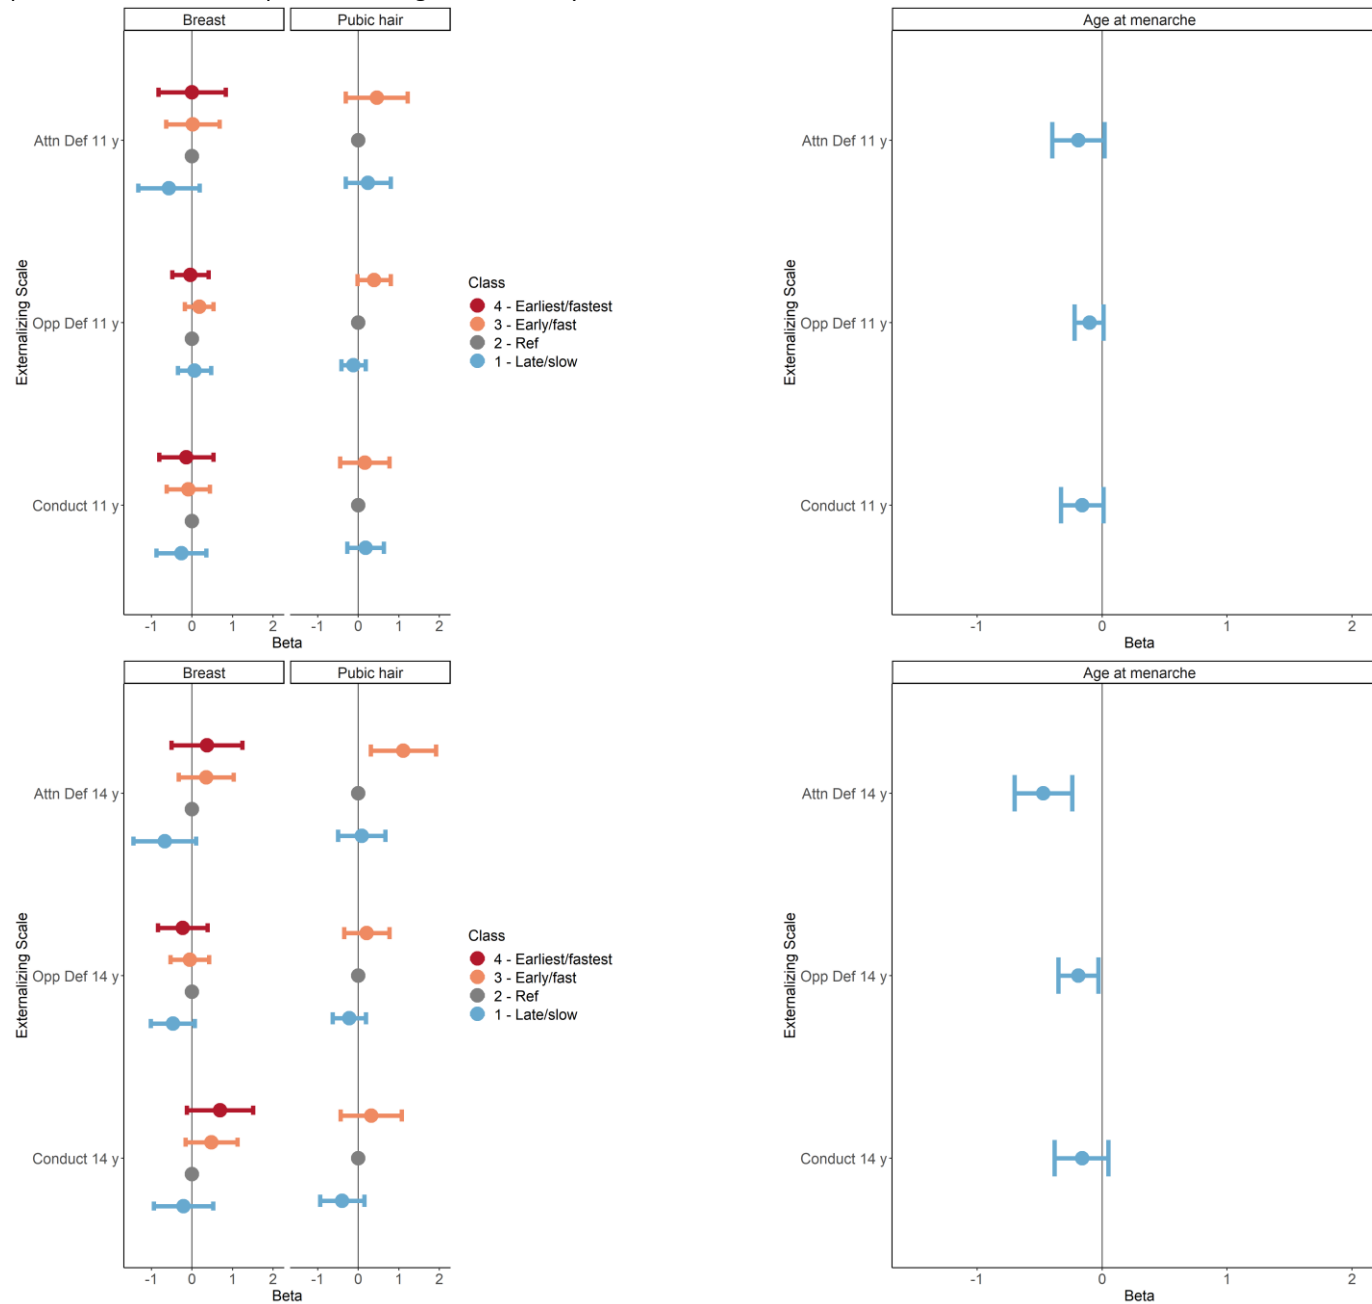

Longitudinal associations of pubertal timing and tempo with adolescent mental health and risk behavior initiation in urban South Africa

**Supplemental Figure S8.** Adjusted associations of female breast and pubic hair development classes and age at menarche with eating attitudes at ages 13 and 17 y

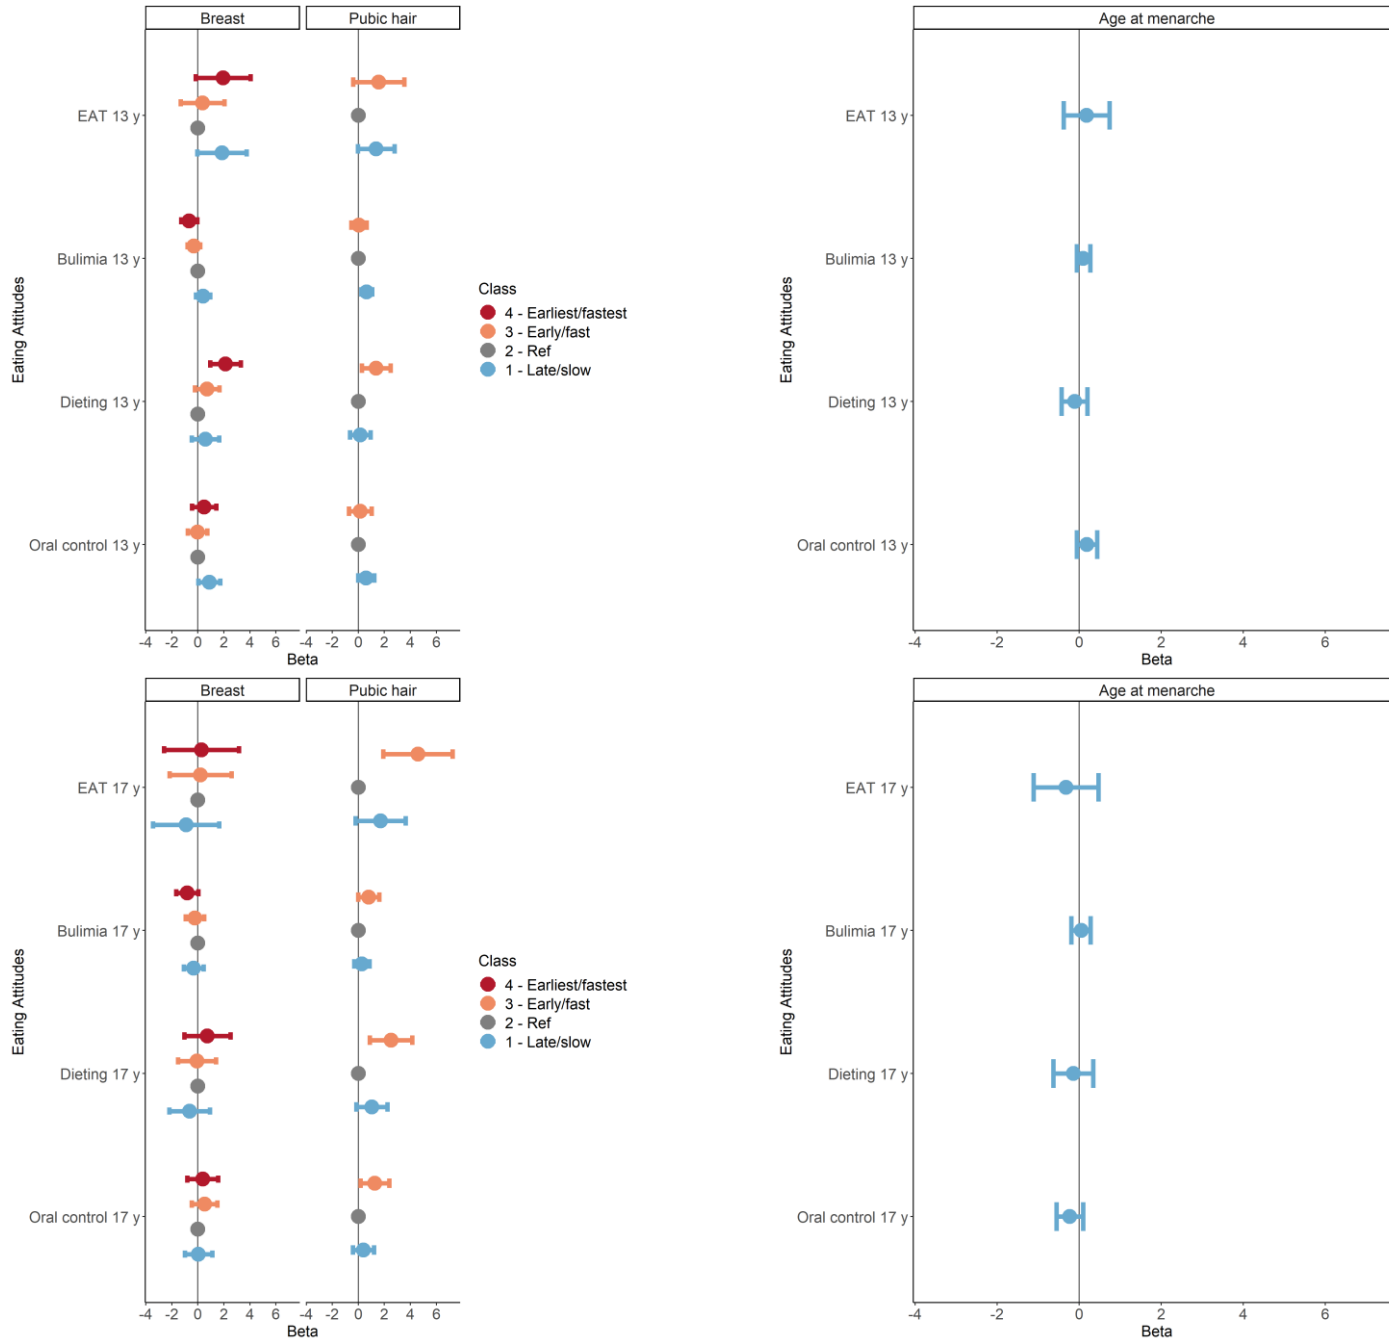

Supplement: mmc1.pdf [file mmc1.pdf]
